# Supplementary material for: Integrating mutation and gene expression cross-sectional data to infer cancer progression
Source: PubMed Central journal article supplement (PMC4727329; doi:10.1186/s12918-016-0255-6), 2016-01-25
Supplement: 12918_2016_255_MOESM1_ESM.pdf [file 12918_2016_255_MOESM1_ESM.pdf]

## MUTATION GENES

| Phase 1  | Phase 2 | Phase 3  |
|----------|---------|----------|
| KIAA1109 | GPR98   | NCOR1    |
| FOXA1    | WNK1    | ARID1A   |
| NOTCH2   | NIPBL   | ZFHX3    |
| TBX3     | MUC20   | ASH1L    |
| UBR4     | COL12A1 | KCNN3    |
| WNK3     | RUNX1   | MAP3K1   |
| ASXL2    | ATM     | CBFB     |
| MLL3     | SMG1    | TMEM132D |
| PCDH10   | HERC1   | ADAMTSL1 |
| LRP1     | TP53    | PCLO     |
| AKAP9    | DNAH8   | PCNXL2   |
| MGA      | MLLT4   | GATA3    |
| DNAH7    | GPR141  | MLL      |
| PIK3CA   | TNRC6B  | CDH1     |
| ANKRD12  | USP9X   | SCN2A    |
| RPGR     | SPEN    | MAP2K4   |
| KIAA0430 | NF1     | AHCTF1   |
| DYSF     | HECW1   | ERBB2    |

|        |       |         |
|--------|-------|---------|
| RB1    | SETD2 | ABCA8   |
| APC    |       | TAF1    |
| PTEN   |       | FBN3    |
| RP1    |       | DMXL1   |
| ZNF292 |       | YLPM1   |
| PCDH19 |       | HSPG2   |
| FLNA   |       | DYNC2H1 |
|        |       | PKHD1   |
|        |       | MYH9    |
|        |       | MYH10   |

EXPRESSION GENES

| Genes  | Phase 1 | Phase 2 | Phase 3 |
|--------|---------|---------|---------|
| HRAS   | 0.2     | 0.35    | 0.45    |
| PGF    | 0.3333  | 0.2857  | 0.3809  |
| PTGS2  | 0.3701  | 0.3702  | 0.2591  |
| STAT5A | 0.3746  | 0.3434  | 0.2809  |
| STAT5B | 0.2332  | 0.3998  | 0.3665  |
| SHH    | 0.452   | 0.3551  | 0.1937  |
| CTNNB1 | 0.3914  | 0.3914  | 0.2175  |
| CUL2   | 0.362   | 0.4258  | 0.213   |
| PIK3CA | 0.3751  | 0.4167  | 0.2085  |
| RARA   | 0.25    | 0.5     | 0.25    |
| FAS    | 0.4003  | 0.3431  | 0.2574  |
| RARB   | 0.259   | 0.4442  | 0.296   |
| CCNA1  | 0.5002  | 0.1667  | 0.3334  |
| PIK3CG | 0.4375  | 0.375   | 0.1875  |
| WNT10A | 0.2779  | 0.4446  | 0.2779  |
| PLD1   | 0.4117  | 0.5293  | 0.0588  |
| WNT10B | 0.3876  | 0.2856  | 0.3264  |
| BCR    | 0.2665  | 0.3666  | 0.3664  |
| BRAF   | 0.3144  | 0.2572  | 0.4287  |
| PIK3CB | 0.3635  | 0.318   | 0.3179  |
| RXRB   | 0.3125  | 0.125   | 0.5625  |
| RXRA   | 0.28    | 0.44    | 0.28    |
| PIK3CD | 0.1666  | 0.5832  | 0.2499  |
| SKP2   | 0.4168  | 0.3751  | 0.2084  |
| RXRG   | 0.4545  | 0.3636  | 0.1818  |
| CTNNA1 | 0.2665  | 0.4665  | 0.2664  |
| CTNNA3 | 0.3683  | 0.2631  | 0.3683  |

|        |        |        |        |
|--------|--------|--------|--------|
| CTNNA2 | 0.4349 | 0.2609 | 0.3045 |
| VEGFB  | 0.4447 | 0.1111 | 0.4448 |
| JUP    | 0.4617 | 0.2693 | 0.2695 |
| MAPK1  | 0.2693 | 0.3078 | 0.4233 |
| VEGFC  | 0.1539 | 0.4233 | 0.4234 |
| PIAS4  | 0.238  | 0.4286 | 0.3332 |
| LAMC3  | 0.3333 | 0.3333 | 0.3332 |
| PIAS3  | 0.3334 | 0.3334 | 0.3334 |
| JUN    | 0.4523 | 0.2142 | 0.3332 |
| MAPK3  | 0.4284 | 0.3809 | 0.1904 |
| VEGFA  | 0.1334 | 0.5334 | 0.3335 |
| PDGFRA | 0.5713 | 0.1429 | 0.2857 |
| MAPK9  | 0.3449 | 0.3104 | 0.345  |
| PDGFRB | 0.2759 | 0.3104 | 0.414  |
| MAPK8  | 0.1904 | 0.3809 | 0.4284 |
| LAMC2  | 0.276  | 0.3104 | 0.414  |
| PIAS2  | 0.1904 | 0.4285 | 0.3808 |
| PIAS1  | 0.3999 | 0.4665 | 0.1332 |
| LAMC1  | 0.4548 | 0.3184 | 0.2274 |
| ITGA2B | 0.36   | 0.32   | 0.32   |
| ERBB2  | 0.1428 | 0.6428 | 0.2142 |
| NFKBIA | 0.3914 | 0.2174 | 0.3915 |
| BCL2L1 | 0.45   | 0.3    | 0.25   |
| LAMB4  | 0.4    | 0.3    | 0.3    |
| LAMB3  | 0.4208 | 0.2631 | 0.3156 |
| KRAS   | 0.2618 | 0.4047 | 0.3332 |
| LAMB2  | 0.44   | 0.36   | 0.2    |
| RAC2   | 0.276  | 0.3794 | 0.345  |
| RAC3   | 0.3335 | 0.2917 | 0.3752 |
| RAC1   | 0.3333 | 0.5237 | 0.1428 |
| LAMB1  | 0.3638 | 0.3637 | 0.273  |
| FH     | 0.28   | 0.44   | 0.28   |

|        |        |        |        |
|--------|--------|--------|--------|
| BMP4   | 0.3122 | 0.406  | 0.2809 |
| DVL2   | 0.3892 | 0.389  | 0.2224 |
| DVL3   | 0.3434 | 0.281  | 0.3745 |
| BMP2   | 0.3057 | 0.3891 | 0.3058 |
| TCF7   | 0.3571 | 0.2858 | 0.3571 |
| MAP2K1 | 0.366  | 0.3171 | 0.3172 |
| MAP2K2 | 0.2665 | 0.2665 | 0.4664 |
| TGFBR1 | 0.35   | 0.35   | 0.3    |
| TGFBR2 | 0.2857 | 0.4285 | 0.2856 |
| CREBBP | 0.3214 | 0.4642 | 0.2142 |
| SMAD4  | 0.2097 | 0.3956 | 0.3959 |
| SMAD3  | 0.2352 | 0.3528 | 0.4116 |
| SMAD2  | 0.3834 | 0.3618 | 0.2556 |
| HGF    | 0.4093 | 0.3183 | 0.273  |
| DVL1   | 0.5002 | 0.2779 | 0.2223 |
| LAMA2  | 0.4761 | 0.1904 | 0.3332 |
| CBLC   | 0.3822 | 0.3823 | 0.2352 |
| LAMA1  | 0.25   | 0.3125 | 0.4375 |
| LAMA4  | 0.1875 | 0.375  | 0.4375 |
| CBLB   | 0.357  | 0.3571 | 0.2856 |
| LAMA3  | 0.3194 | 0.2343 | 0.4472 |
| LAMA5  | 0.3242 | 0.3513 | 0.3241 |
| ETS1   | 0.3636 | 0.2727 | 0.3636 |
| NTRK1  | 0.2352 | 0.1764 | 0.5881 |
| FGF6   | 0.3571 | 0.2142 | 0.4284 |
| FGF5   | 0.4054 | 0.2431 | 0.3512 |
| PPARD  | 0.2104 | 0.421  | 0.3682 |
| FGF8   | 0.3703 | 0.3702 | 0.2591 |
| FGF7   | 0.4447 | 0.2778 | 0.278  |
| FGF9   | 0.2819 | 0.333  | 0.3842 |
| PPARG  | 0.3683 | 0.3157 | 0.3156 |
| MITF   | 0.3334 | 0.3334 | 0.3334 |

|        |        |        |        |
|--------|--------|--------|--------|
| SPI1   | 0.4285 | 0.2381 | 0.3333 |
| MLH1   | 0.3621 | 0.3833 | 0.2556 |
| NFKB1  | 0.3528 | 0.3529 | 0.294  |
| NFKB2  | 0.3683 | 0.3158 | 0.3157 |
| GLI2   | 0.4001 | 0.2667 | 0.3334 |
| GLI3   | 0.35   | 0.25   | 0.4    |
| PTEN   | 0.28   | 0.48   | 0.24   |
| GLI1   | 0.4999 | 0.3214 | 0.1785 |
| FLT3LG | 0.2904 | 0.4195 | 0.2907 |
| CCNE2  | 0.3157 | 0.3683 | 0.3157 |
| CCNE1  | 0.3    | 0.25   | 0.45   |
| TGFA   | 0.6524 | 0.2174 | 0.1305 |
| HHIP   | 0.4616 | 0.1923 | 0.3463 |
| NOS2A  | 0.3808 | 0.2857 | 0.3332 |
| FGF1   | 0.225  | 0.3    | 0.475  |
| MYC    | 0.3587 | 0.3331 | 0.3074 |
| FGF2   | 0.4375 | 0.1875 | 0.375  |
| FGF3   | 0.25   | 0.5625 | 0.1875 |
| FGF4   | 0.5002 | 0.1667 | 0.3335 |
| AR     | 0.4058 | 0.3295 | 0.2663 |
| CTBP1  | 0.1904 | 0.4761 | 0.3332 |
| CTBP2  | 0.4829 | 0.2069 | 0.3104 |
| TP53   | 0.4349 | 0.3044 | 0.261  |
| RAD51  | 0.4841 | 0.3227 | 0.1937 |
| CCND1  | 0.2668 | 0.4001 | 0.3335 |
| WNT9B  | 0.2905 | 0.3872 | 0.3229 |
| WNT9A  | 0.3332 | 0.3665 | 0.3    |
| BID    | 0.36   | 0.32   | 0.32   |
| APC2   | 0.3891 | 0.389  | 0.2224 |
| PML    | 0.174  | 0.5218 | 0.3045 |
| TFG    | 0.244  | 0.4879 | 0.2684 |
| ZBTB16 | 0.4642 | 0.3571 | 0.1785 |

|        |        |        |        |
|--------|--------|--------|--------|
| KIT    | 0.2856 | 0.4285 | 0.2856 |
| SUFU   | 0.1819 | 0.5001 | 0.3184 |
| SOS1   | 0.3333 | 0.3333 | 0.3333 |
| BCL2   | 0.2499 | 0.3214 | 0.4284 |
| SOS2   | 0.3228 | 0.4194 | 0.2584 |
| WNT8A  | 0.3679 | 0.3329 | 0.2978 |
| WNT8B  | 0.3214 | 0.3928 | 0.2856 |
| FZD9   | 0.3242 | 0.3783 | 0.2971 |
| FZD8   | 0.4001 | 0.4001 | 0.2001 |
| IL6    | 0.4547 | 0.2274 | 0.3183 |
| IL8    | 0.4443 | 0.2591 | 0.296  |
| FZD1   | 0.3156 | 0.3683 | 0.3157 |
| IGF1   | 0.3044 | 0.4783 | 0.2175 |
| BIRC5  | 0.3479 | 0.2175 | 0.4349 |
| FZD3   | 0.3945 | 0.342  | 0.263  |
| FZD2   | 0.3479 | 0.2609 | 0.3915 |
| MAPK10 | 0.2352 | 0.3529 | 0.4116 |
| APPL1  | 0.36   | 0.4    | 0.24   |
| STAT1  | 0.278  | 0.3613 | 0.3614 |
| BIRC3  | 0.3927 | 0.2857 | 0.3213 |
| FZD5   | 0.38   | 0.3    | 0.32   |
| BIRC2  | 0.3333 | 0.3999 | 0.2665 |
| FZD4   | 0.2424 | 0.4545 | 0.303  |
| FZD7   | 0.3028 | 0.3491 | 0.3493 |
| STAT3  | 0.28   | 0.32   | 0.4    |
| FZD6   | 0.3157 | 0.263  | 0.4208 |
| NRAS   | 0.3587 | 0.3398 | 0.3023 |
| WNT7B  | 0.3528 | 0.3332 | 0.3136 |
| RASSF5 | 0.24   | 0.36   | 0.4    |
| GSK3B  | 0.3794 | 0.3449 | 0.276  |
| RASSF1 | 0.1364 | 0.4547 | 0.4095 |
| ARAF   | 0.44   | 0.28   | 0.28   |

|        |        |        |        |
|--------|--------|--------|--------|
| TCEB2  | 0.45   | 0.4    | 0.15   |
| PTCH1  | 0.3957 | 0.3026 | 0.3028 |
| TCEB1  | 0.3331 | 0.2998 | 0.3665 |
| PTCH2  | 0.3849 | 0.3079 | 0.308  |
| WNT7A  | 0.5    | 0.35   | 0.15   |
| FGF19  | 0.4545 | 0.3636 | 0.1818 |
| FGF18  | 0.3474 | 0.2388 | 0.4127 |
| PDGFB  | 0.2858 | 0.4859 | 0.2287 |
| PDGFA  | 0.3638 | 0.2728 | 0.364  |
| FGF14  | 0.3335 | 0.1667 | 0.5004 |
| MMP9   | 0.4168 | 0.2084 | 0.3753 |
| WNT3A  | 0.2309 | 0.3077 | 0.4619 |
| FGF17  | 0.3153 | 0.3856 | 0.2978 |
| STK36  | 0.4446 | 0.3334 | 0.2224 |
| ARNT2  | 0.3957 | 0.2794 | 0.3261 |
| TGFB3  | 0.2856 | 0.4047 | 0.3094 |
| FGF11  | 0.3331 | 0.2    | 0.4666 |
| FOXO1  | 0.3782 | 0.2702 | 0.3512 |
| FGF10  | 0.3752 | 0.3751 | 0.2502 |
| FGF13  | 0.2857 | 0.3809 | 0.3332 |
| FGF12  | 0.3701 | 0.3701 | 0.2591 |
| MMP2   | 0.6113 | 0.1667 | 0.2223 |
| MMP1   | 0.4    | 0.35   | 0.25   |
| TGFB1  | 0.2381 | 0.2381 | 0.5236 |
| TGFB2  | 0.2    | 0.35   | 0.45   |
| WNT2   | 0.4349 | 0.1739 | 0.3915 |
| WNT1   | 0.4784 | 0.3479 | 0.174  |
| WNT4   | 0.2999 | 0.3998 | 0.2998 |
| CDKN2A | 0.3    | 0.65   | 0.05   |
| WNT3   | 0.28   | 0.36   | 0.36   |
| CDKN2B | 0.414  | 0.4484 | 0.138  |
| SLC2A1 | 0.3794 | 0.3794 | 0.2415 |



|       |        |        |        |
|-------|--------|--------|--------|
| RALB  | 0.24   | 0.52   | 0.24   |
| CSF3R | 0.2856 | 0.4286 | 0.2857 |
| RALA  | 0.4    | 0.36   | 0.24   |
| WNT6  | 0.261  | 0.4349 | 0.3045 |
| EGFR  | 0.3809 | 0.3333 | 0.2856 |
| RET   | 0.2561 | 0.333  | 0.4098 |
| RELA  | 0.2631 | 0.4209 | 0.3157 |
| FGF23 | 0.357  | 0.1428 | 0.4998 |
| FADD  | 0.3335 | 0.2917 | 0.3751 |
| FGF22 | 0.2759 | 0.2414 | 0.4829 |
| FGF21 | 0.3939 | 0.3333 | 0.2727 |
| FGF20 | 0.2728 | 0.2729 | 0.4548 |
| STK4  | 0.2275 | 0.5001 | 0.273  |
| CCDC6 | 0.3183 | 0.5002 | 0.1819 |
| EP300 | 0.348  | 0.4349 | 0.2175 |
| HIF1A | 0.5182 | 0.1851 | 0.296  |
| TRAF1 | 0.3335 | 0.2779 | 0.3891 |
| FGFR2 | 0.4785 | 0.4348 | 0.087  |
| WNT5A | 0.3463 | 0.3846 | 0.2695 |
| TRAF2 | 0.3105 | 0.3794 | 0.3104 |
| FGFR1 | 0.45   | 0.3    | 0.25   |
| WNT5B | 0.3234 | 0.4117 | 0.2646 |
| FGFR3 | 0.3683 | 0.3684 | 0.2631 |
| GRB2  | 0.2105 | 0.421  | 0.3683 |
| ITGB1 | 0.44   | 0.28   | 0.28   |
| RBX1  | 0.357  | 0.2857 | 0.357  |
| ARNT  | 0.3334 | 0.2667 | 0.4    |
| PTK2  | 0.5002 | 0.2501 | 0.2502 |
| ITGAV | 0.48   | 0.32   | 0.2    |
| EGF   | 0.294  | 0.2352 | 0.4705 |
| TRAF6 | 0.3528 | 0.5881 | 0.0588 |
| AXIN2 | 0.3808 | 0.3333 | 0.2856 |

|         |        |        |        |
|---------|--------|--------|--------|
| RUNX1   | 0.5    | 0.125  | 0.375  |
| TRAF5   | 0.4616 | 0.1539 | 0.3849 |
| TRAF4   | 0.3123 | 0.2811 | 0.4059 |
| TRAF3   | 0.2918 | 0.5418 | 0.1668 |
| CSF1R   | 0.3145 | 0.3144 | 0.3715 |
| FN1     | 0.28   | 0.2    | 0.52   |
| AXIN1   | 0.25   | 0.35   | 0.4    |
| EPAS1   | 0.3386 | 0.3386 | 0.3222 |
| MET     | 0.4139 | 0.3794 | 0.207  |
| ITGA2   | 0.3861 | 0.4088 | 0.2044 |
| BRCA2   | 0.3571 | 0.3928 | 0.2499 |
| ITGA3   | 0.263  | 0.4736 | 0.263  |
| CDKN1A  | 0.4073 | 0.2963 | 0.2962 |
| HDAC2   | 0.2857 | 0.4286 | 0.2856 |
| CDKN1B  | 0.4    | 0.2    | 0.4    |
| HDAC1   | 0.3172 | 0.2928 | 0.3904 |
| ITGA6   | 0.4233 | 0.3847 | 0.1925 |
| PLCG1   | 0.25   | 0.5    | 0.25   |
| PLCG2   | 0.2856 | 0.3809 | 0.3332 |
| IKBKG   | 0.389  | 0.3334 | 0.278  |
| IKBKB   | 0.4    | 0.32   | 0.28   |
| ABL1    | 0.3079 | 0.4232 | 0.2695 |
| E2F1    | 0.4761 | 0.1905 | 0.3332 |
| HSP90AB | 0.303  | 0.2727 | 0.4242 |
| E2F2    | 0.3914 | 0.3914 | 0.2175 |
| E2F3    | 0.3228 | 0.355  | 0.3229 |
| FASLG   | 0.2961 | 0.3701 | 0.3331 |
| AKT1    | 0.2817 | 0.3332 | 0.3842 |
| CDC42   | 0.2221 | 0.4074 | 0.3702 |
| MAX     | 0.294  | 0.2941 | 0.4116 |
| FOS     | 0.3846 | 0.2306 | 0.3842 |
| CASP3   | 0.52   | 0.44   | 0.04   |

|         |        |        |        |
|---------|--------|--------|--------|
| CASP9   | 0.3717 | 0.2858 | 0.343  |
| PAX8    | 0.4442 | 0.2962 | 0.2591 |
| CASP8   | 0.421  | 0.1052 | 0.4734 |
| RHOA    | 0.4617 | 0.3462 | 0.1924 |
| TPR     | 0.3479 | 0.348  | 0.3045 |
| CHUK    | 0.294  | 0.3529 | 0.3528 |
| AKT3    | 0.3637 | 0.3183 | 0.3184 |
| AKT2    | 0.4573 | 0.2573 | 0.2858 |
| PRKCA   | 0.308  | 0.4616 | 0.231  |
| HSP90AA | 0.4139 | 0.2069 | 0.3795 |
| RALBP1  | 0.3479 | 0.4783 | 0.174  |
| CYCS    | 0.3872 | 0.5164 | 0.0969 |
| RUNX1T1 | 0.3571 | 0.3571 | 0.2856 |
| LEF1    | 0.2105 | 0.3683 | 0.421  |
| CDK6    | 0.3914 | 0.3044 | 0.3045 |
| PRKCG   | 0.3664 | 0.3332 | 0.2997 |
| RB1     | 0.3663 | 0.4333 | 0.1998 |
| CDK4    | 0.2905 | 0.4517 | 0.2583 |
| DAPK2   | 0.36   | 0.32   | 0.32   |
| DAPK3   | 0.2823 | 0.3476 | 0.3692 |
| CDK2    | 0.357  | 0.357  | 0.2856 |
| PRKCB1  | 0.4285 | 0.3571 | 0.2142 |
| DAPK1   | 0.2963 | 0.3332 | 0.3702 |
| SMO     | 0.3794 | 0.4139 | 0.207  |
| CRKL    | 0.36   | 0.32   | 0.32   |
| NCOA4   | 0.4548 | 0.3183 | 0.2274 |
| MDM2    | 0.4761 | 0.3809 | 0.1429 |
| WNT11   | 0.4761 | 0.2381 | 0.2856 |
| GSTP1   | 0.2631 | 0.3158 | 0.4209 |
| DCC     | 0.4166 | 0.25   | 0.3333 |
| CKS1B   | 0.432  | 0.3376 | 0.2295 |
| WNT16   | 0.348  | 0.2175 | 0.435  |
| EGLN3   | 0.2224 | 0.389  | 0.3892 |
| EGLN2   | 0.3809 | 0.1904 | 0.4284 |
| KITLG   | 0.4669 | 0.3334 | 0.2001 |
| EGLN1   | 0.2501 | 0.3752 | 0.3752 |

|         |        |        |        |
|---------|--------|--------|--------|
| CDH1    | 0.3551 | 0.2582 | 0.3872 |
| TCF7L2  | 0.348  | 0.3914 | 0.261  |
| TCF7L1  | 0.4317 | 0.2953 | 0.2725 |
| TPM3    | 0.4072 | 0.2592 | 0.333  |
| IGF1R   | 0.303  | 0.4848 | 0.2121 |
| PIK3R5  | 0.375  | 0.3125 | 0.3125 |
| PIK3R3  | 0.4    | 0.35   | 0.25   |
| FIGF    | 0.44   | 0.2    | 0.36   |
| PIK3R1  | 0.3172 | 0.3171 | 0.366  |
| PIK3R2  | 0.3874 | 0.3872 | 0.2261 |
| APC     | 0.4549 | 0.3182 | 0.2274 |
| CEBPA   | 0.3332 | 0.2962 | 0.37   |
| COL4A4  | 0.2928 | 0.244  | 0.4636 |
| MSH6    | 0.4183 | 0.3043 | 0.279  |
| COL4A2  | 0.2631 | 0.421  | 0.3156 |
| COL4A1  | 0.3335 | 0.3334 | 0.3336 |
| MSH3    | 0.4442 | 0.3332 | 0.222  |
| KLK3    | 0.4349 | 0.2609 | 0.3045 |
| VHL     | 0.261  | 0.5219 | 0.2175 |
| MSH2    | 0.3637 | 0.3182 | 0.3185 |
| FLT3    | 0.3462 | 0.0769 | 0.5771 |
| CBL     | 0.364  | 0.2728 | 0.3639 |
| RAF1    | 0.3939 | 0.303  | 0.303  |
| BAD     | 0.3463 | 0.3848 | 0.2694 |
| RALGDS  | 0.3463 | 0.2693 | 0.3849 |
| COL4A6  | 0.4441 | 0.3702 | 0.185  |
| WNT2B   | 0.3845 | 0.3846 | 0.2307 |
| HSP90B1 | 0.5237 | 0.1904 | 0.2856 |
| FZD10   | 0.3939 | 0.2424 | 0.3636 |
| BAX     | 0.3094 | 0.357  | 0.3332 |
| JAK1    | 0.3234 | 0.3528 | 0.3234 |
| CRK     | 0.276  | 0.3794 | 0.345  |
